# Supplementary material for: Blood quality evaluation via on-chip classification of cell morphology using a deep learning algorithm
Source: Royal Society of Chemistry journal article supplement (doi:10.1039/d2lc01078j), 2023-01-01
Supplement: d2lc01078j1.pdf [file d2lc01078j1.pdf]

## Supplementary materials

### Blood quality evaluation via on-chip classification of cell morphology using deep learning algorithm

Yuping Yang,<sup>a,b</sup> Hong He,<sup>a</sup> Junju Wang,<sup>a</sup> Li Chen,<sup>a</sup> Yi Xu,<sup>a</sup> Chuang Ge<sup>c,\*</sup> and Shunbo Li<sup>a,\*</sup>

a. Key Laboratory of Optoelectronic Technology and Systems, Ministry of Education & Key Disciplines Laboratory of Novel Micro-Nano Devices and System Technology, College of Optoelectronic Engineering, Chongqing University, Chongqing 400044, China. Email: shunbo.li@cqu.edu.cn.

b. Chongqing College of Electronic Engineering, Chongqing 401331, China.

c. Chongqing Key Laboratory of Translational Research for Cancer Metastasis and Individualized Treatment, Chongqing University Cancer Hospital, Chongqing 400030, China. Email: gechuang1115@163.com.

#### SDC

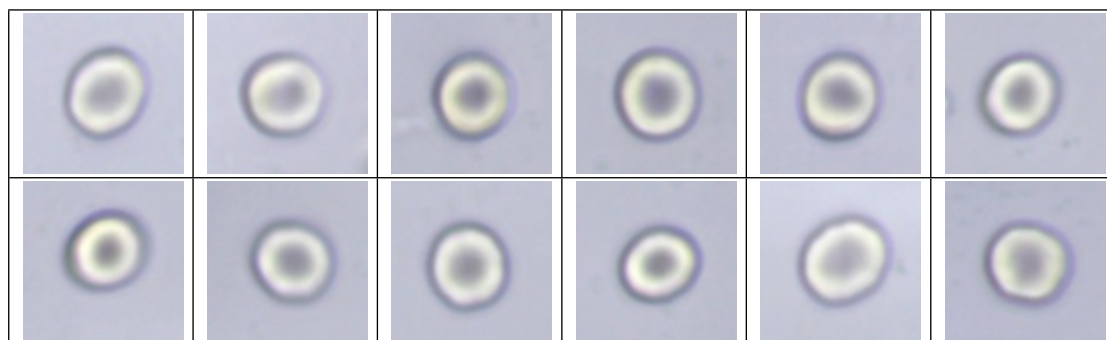

#### CDC

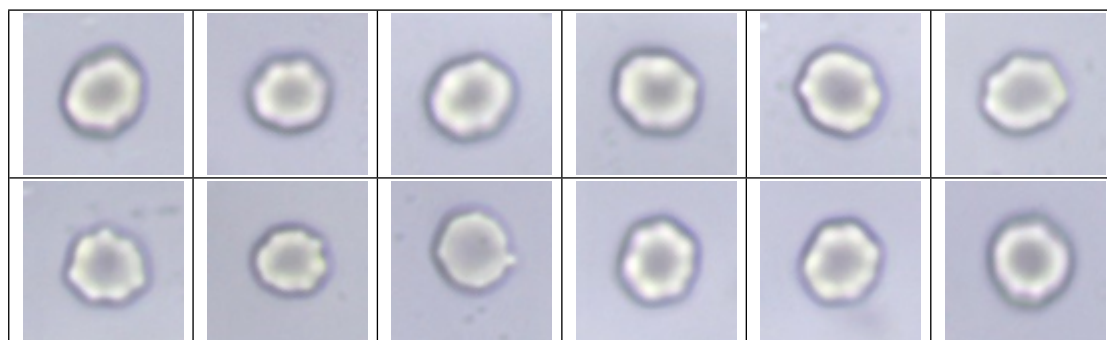

#### CDD

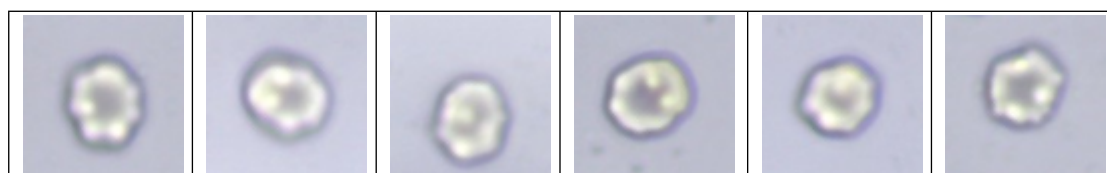

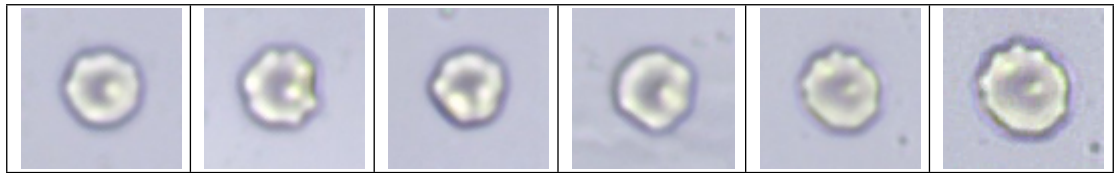

**CSD**

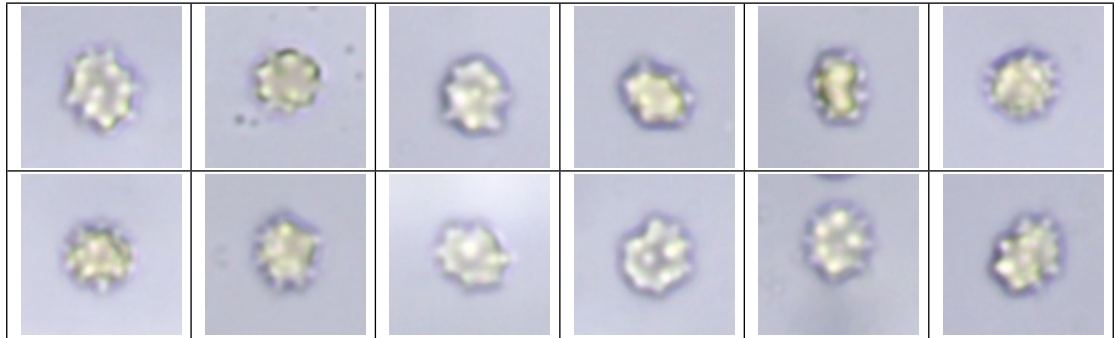

**CSE**

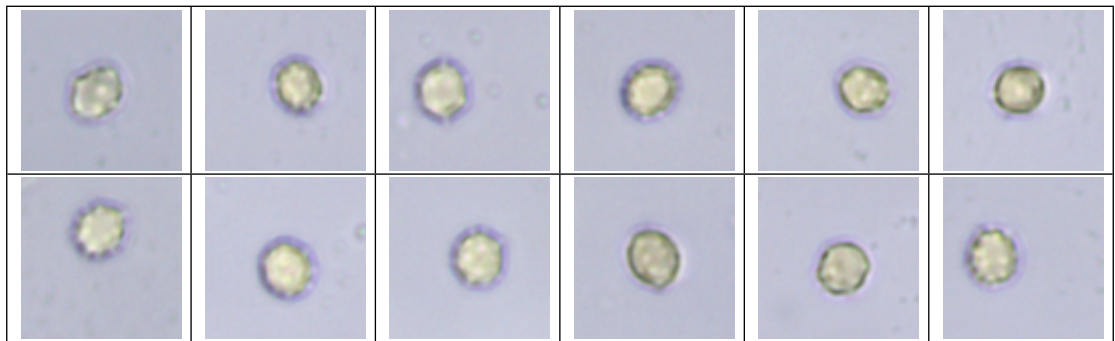

**SSE**

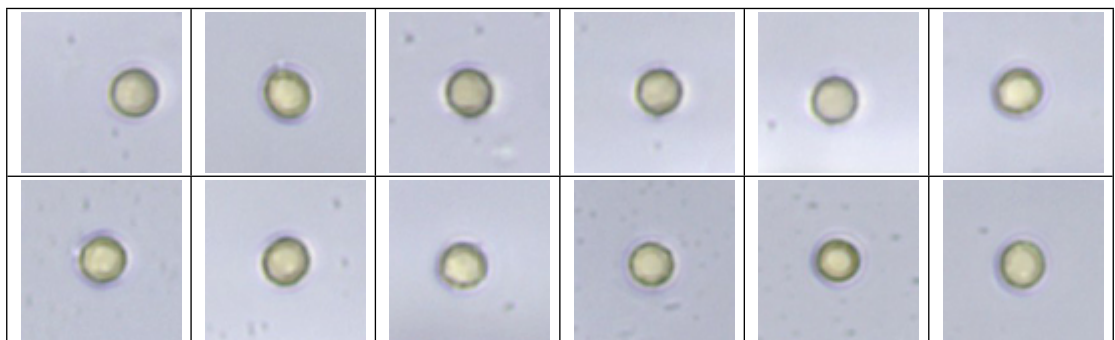

Fig. S1 Typical images of RBCs with different morphologies.

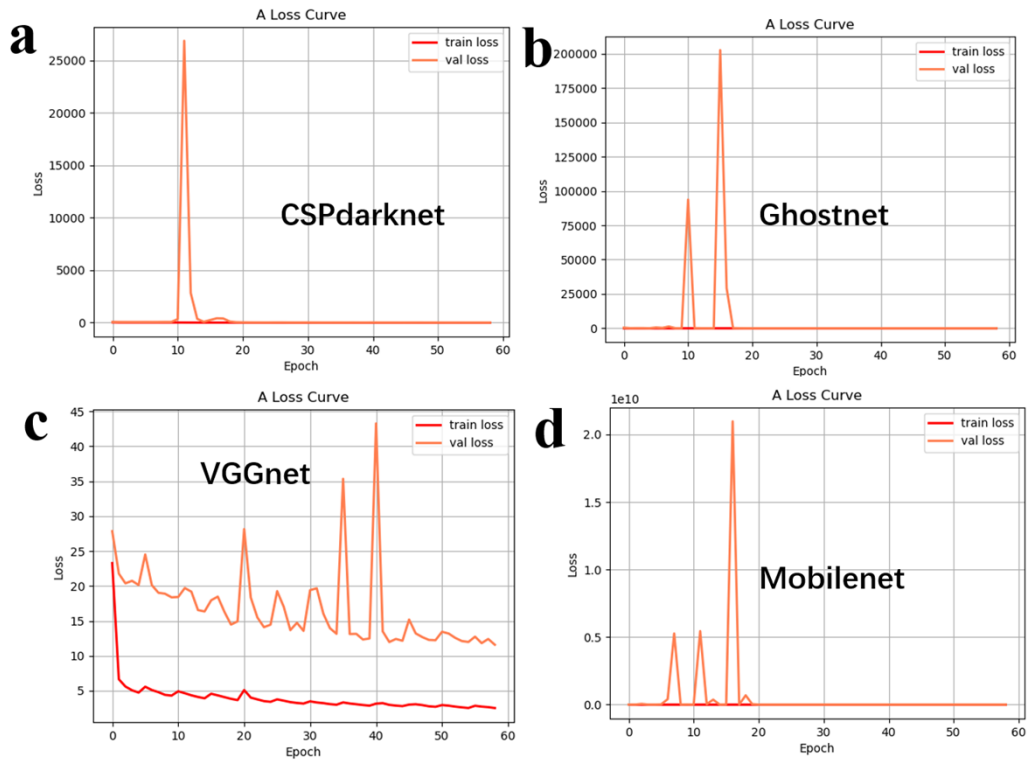

Fig. S2 Convergence of training loss and validation loss when using different model as the Backbone: (a) CSPdarkNet; (b) GhostNet; (c) VGG19; (d) MobileNet.

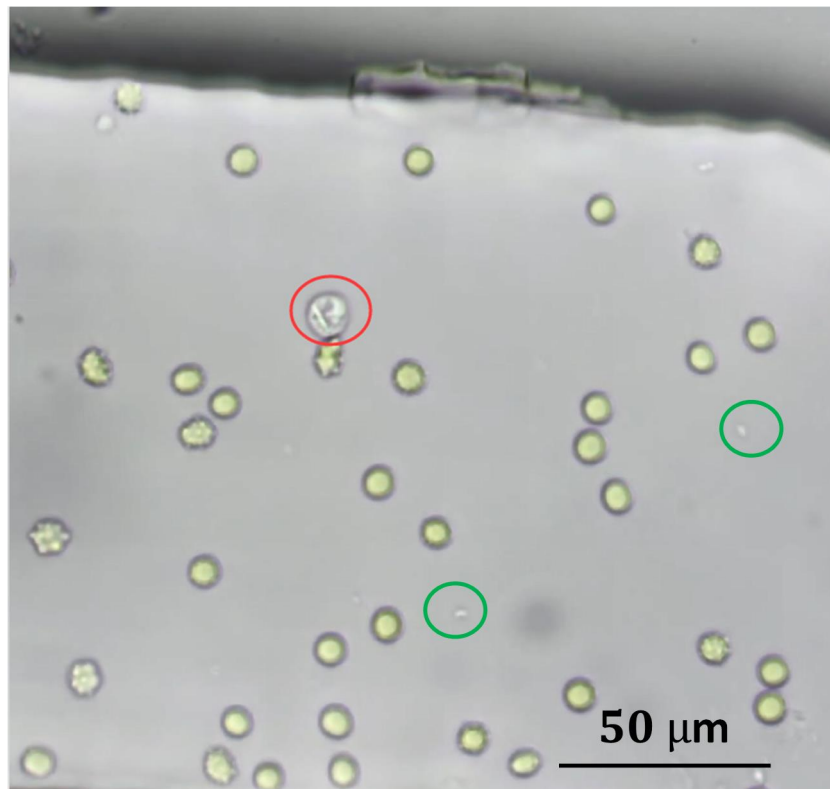

Fig. S3 Optical image of blood cells in the designed microchannel. White blood cell is marked by red circle and platelets are marked by green circles.
